# Supplementary material for: Characterization of the Gut-Associated Microbiome in Inflammatory Pouch Complications Following Ileal Pouch-Anal Anastomosis
Source: PubMed Central journal article supplement (PMC3782502; doi:10.1371/journal.pone.0066934), 2013-09-24
Supplement: pone.0066934.s009.pdf [file pone.0066934.s009.pdf]

Table S1: Endoscopic and histological characteristics included in the objective pouchitis score used to define inflammation.

| Trait                                    | Severity                                                                                                                                                              | Scoring    |
|------------------------------------------|-----------------------------------------------------------------------------------------------------------------------------------------------------------------------|------------|
| Erythema                                 | None, mild, severe                                                                                                                                                    | 0, 2, 3    |
| Friability                               | None, mild, severe                                                                                                                                                    | 0, 1, 2    |
| Ulceration                               | None, mild, severe                                                                                                                                                    | 0, 2, 3    |
| Polymorphonuclear leukocyte infiltration | None, discrete and patchy (largely confined to surface epithelium), moderate ( $\pm$ ) crypt abscesses or cryptitis, extensive ( $\pm$ ) crypt abscesses or cryptitis | 0, 1, 2, 3 |
| Ulcerations/Erosions                     | None, mild and superficial, moderate, extensive                                                                                                                       | 0, 1, 2, 3 |
| Total possible score                     |                                                                                                                                                                       | 14         |
| Total score for inflammation             |                                                                                                                                                                       | >3         |
