# Supplementary material for: Characterization of the Gut-Associated Microbiome in Inflammatory Pouch Complications Following Ileal Pouch-Anal Anastomosis
Source: PubMed Central journal article supplement (PMC3782502; doi:10.1371/journal.pone.0066934), 2013-09-24
Supplement: pone.0066934.s013.pdf [file pone.0066934.s013.pdf]

Supplementary Table 5: Genera achieving a nominal significance level of  $P < 0.05$  in four-way comparison.

| Location           | Phylum                       | Genus                               | FET P-value          | FET P-value (corr)   | KWT P-value          | KWT P-value (corr)   |
|--------------------|------------------------------|-------------------------------------|----------------------|----------------------|----------------------|----------------------|
| Pouch              | Actinobacteria               | <i>Corynebacterium</i>              | 0.02                 | 0.15                 | 0.03                 | 0.16                 |
|                    | Bacteroidetes                | <i>Bacteroides</i>                  | $3.6 \times 10^{-6}$ | $3.0 \times 10^{-4}$ | $5.7 \times 10^{-7}$ | $4.7 \times 10^{-5}$ |
|                    |                              | <i>Parabacteroides</i>              | $1.2 \times 10^{-4}$ | $4.9 \times 10^{-3}$ | $7.8 \times 10^{-4}$ | 0.02                 |
|                    | Firmicutes                   | <i>Moryella</i>                     | $2.5 \times 10^{-3}$ | 0.05                 | $1.4 \times 10^{-3}$ | 0.03                 |
|                    |                              | <i>Blautia</i>                      | $3.0 \times 10^{-3}$ | 0.05                 | $2.3 \times 10^{-4}$ | $9.5 \times 10^{-3}$ |
|                    |                              | <i>Dorea</i>                        | 0.02                 | 0.13                 | 0.01                 | 0.09                 |
|                    |                              | <i>Phascolarctobacterium</i>        | $9.6 \times 10^{-3}$ | 0.10                 | 0.02                 | 0.15                 |
|                    |                              | IS <i>Erysipelotrichaceae</i>       | 0.02                 | 0.14                 | 0.03                 | 0.16                 |
|                    |                              | <i>Dialister</i>                    | 0.02                 | 0.13                 | 0.02                 | 0.15                 |
|                    |                              | Uncultured <i>Lachnospiraceae</i>   | 0.04                 | 0.20                 | $6.9 \times 10^{-3}$ | 0.07                 |
|                    |                              | Uncultured <i>Ruminococcaceae</i>   | 0.04                 | 0.20                 | $7.1 \times 10^{-3}$ | 0.07                 |
|                    |                              | <i>Subdoligranulum</i>              | 0.01                 | 0.13                 | 0.03                 | 0.16                 |
|                    |                              | Uncultured Family XIII IS           | $8.5 \times 10^{-3}$ | 0.10                 | $7.7 \times 10^{-3}$ | 0.07                 |
|                    | <i>Roseburia</i>             | 0.07                                | 0.31                 | 0.04                 | 0.17                 |                      |
|                    | Proteobacteria               | <i>Sutterella</i>                   | $2.5 \times 10^{-3}$ | 0.05                 | $2.4 \times 10^{-3}$ | 0.04                 |
| <i>Rhodobacter</i> |                              | 0.01                                | 0.09                 | 0.03                 | 0.16                 |                      |
| <i>Haemophilus</i> |                              | 0.13                                | 0.39                 | $5.9 \times 10^{-3}$ | 0.12                 |                      |
| Afferent Limb      | Actinobacteria               | Uncultured <i>Coriobacteriaceae</i> | 0.03                 | 0.17                 | 0.03                 | 0.20                 |
|                    |                              | <i>Collinsella</i>                  | 0.02                 | 0.16                 | 0.02                 | 0.19                 |
|                    | Bacteroidetes                | <i>Bacteroides</i>                  | $6.9 \times 10^{-6}$ | $2.9 \times 10^{-4}$ | $4.2 \times 10^{-6}$ | $3.4 \times 10^{-4}$ |
|                    |                              | <i>Parabacteroides</i>              | $2.2 \times 10^{-3}$ | 0.03                 | $8.8 \times 10^{-3}$ | 0.10                 |
|                    | Firmicutes                   | <i>Moryella</i>                     | 0.03                 | 0.17                 | 0.03                 | 0.20                 |
|                    |                              | <i>Blautia</i>                      | $8.2 \times 10^{-7}$ | $6.8 \times 10^{-5}$ | $1.1 \times 10^{-4}$ | $4.7 \times 10^{-3}$ |
|                    |                              | <i>Dorea</i>                        | $1.0 \times 10^{-3}$ | 0.03                 | $4.2 \times 10^{-3}$ | 0.07                 |
|                    |                              | <i>Anaerococcus</i>                 | $2.8 \times 10^{-3}$ | 0.05                 | $8.4 \times 10^{-3}$ | 0.11                 |
|                    |                              | IS <i>Erysipelotrichaceae</i>       | $4.5 \times 10^{-3}$ | 0.05                 | $4.0 \times 10^{-3}$ | 0.07                 |
|                    |                              | <i>Roseburia</i>                    | 0.02                 | 0.15                 | 0.08                 | 0.30                 |
|                    |                              | Uncultured Family XIII IS           | 0.01                 | 0.13                 | 0.03                 | 0.19                 |
|                    |                              | <i>Granulicatella</i>               | 0.07                 | 0.31                 | 0.03                 | 0.19                 |
|                    |                              | <i>Dialister</i>                    | 0.05                 | 0.23                 | 0.05                 | 0.21                 |
|                    |                              | <i>Lactobacillus</i>                | 0.03                 | 0.17                 | 0.01                 | 0.15                 |
|                    |                              | <i>Mogibacterium</i>                | 0.04                 | 0.20                 | 0.05                 | 0.21                 |
|                    | <i>Phascolarctobacterium</i> | 0.02                                | 0.16                 | 0.03                 | 0.19                 |                      |
|                    | Proteobacteria               | <i>Sutterella</i>                   | $1.7 \times 10^{-3}$ | 0.03                 | $8.5 \times 10^{-4}$ | 0.02                 |
|                    |                              | <i>Rhodobacter</i>                  | 0.03                 | 0.17                 | 0.05                 | 0.21                 |
| <i>Haemophilus</i> |                              | 0.12                                | 0.37                 | 0.05                 | 0.21                 |                      |

FET=Fisher's exact test (dichotomous results); KWT=Kruskal-Wallis Test (continuous results). Highlighted rows are those which remained significant in either analysis after FDR correction for multiple testing.
